# Supplementary figures and images for: Distributed Bayesian networks reconstruction on the whole genome scale
Source: PeerJ journal article supplement (doi:10.7717/peerj.5692), 2018-10-19

**cornersfold 0 (AUC=0.948700)**

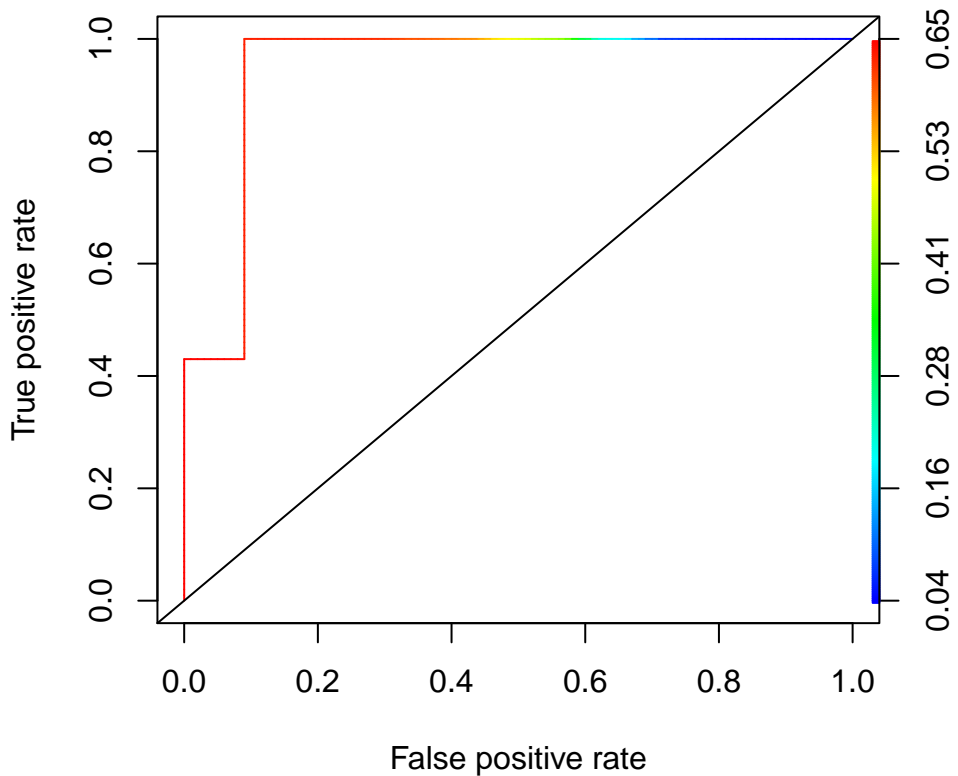

Supplement: bnfinder-2.2.zip [file bnfinder-2.2.zip]
